# Supplementary material
Source: PubMed Central journal article supplement (PMC3180811)
Supplement: supp_tpc.111.087312_Scotti_Supplemental_Data_final.pdf [file supp_tpc.111.087312_Scotti_Supplemental_Data_final.pdf]

### Full length cDNA of CYP716A12 (1620bp)

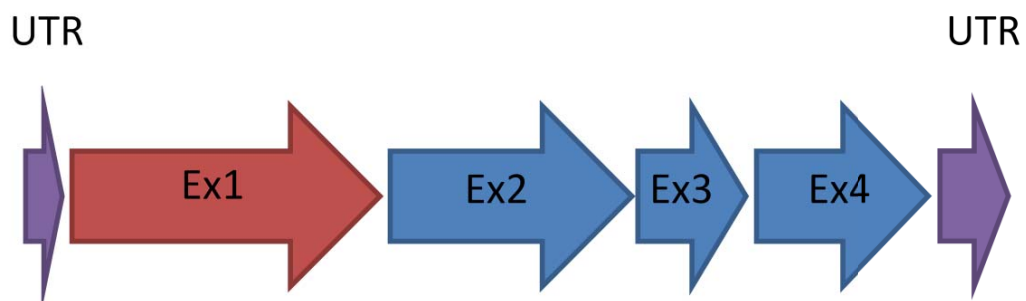

### Splicing variant of CYP716A12 (1085bp)

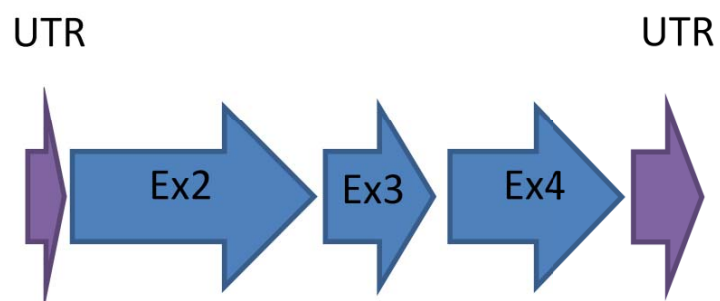

**Supplemental Figure 1.** CYP716A12 splicing variant

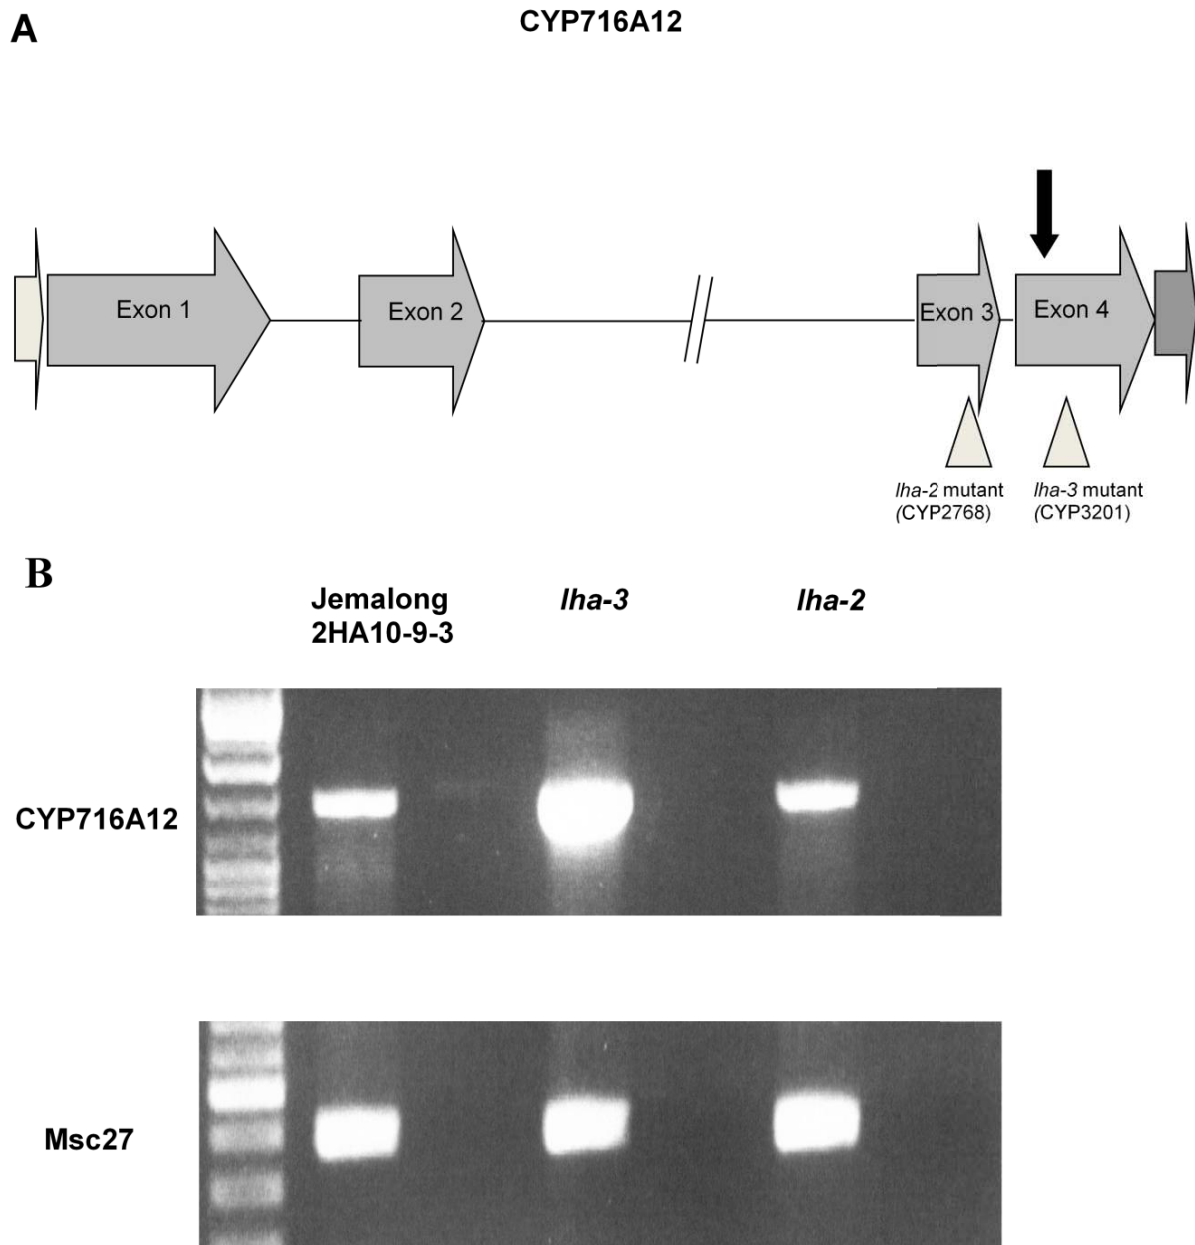

**Supplemental Figure 2.** Mutant alleles for CYP716A12 in TILLING collection.

**(A)** Alleles of CYP716A12 obtained from the TILLING collection (solid triangle): *lha-2* CYP2768 (P355→L) and *lha-3* CYP3201 (W449→ stop) lines. The position of the heme cysteine ligand is indicated (black arrow).

**(B)** RT-PCR analysis of transcript level of CYP716A12 gene in *lha-2* and *lha-3* mutants.

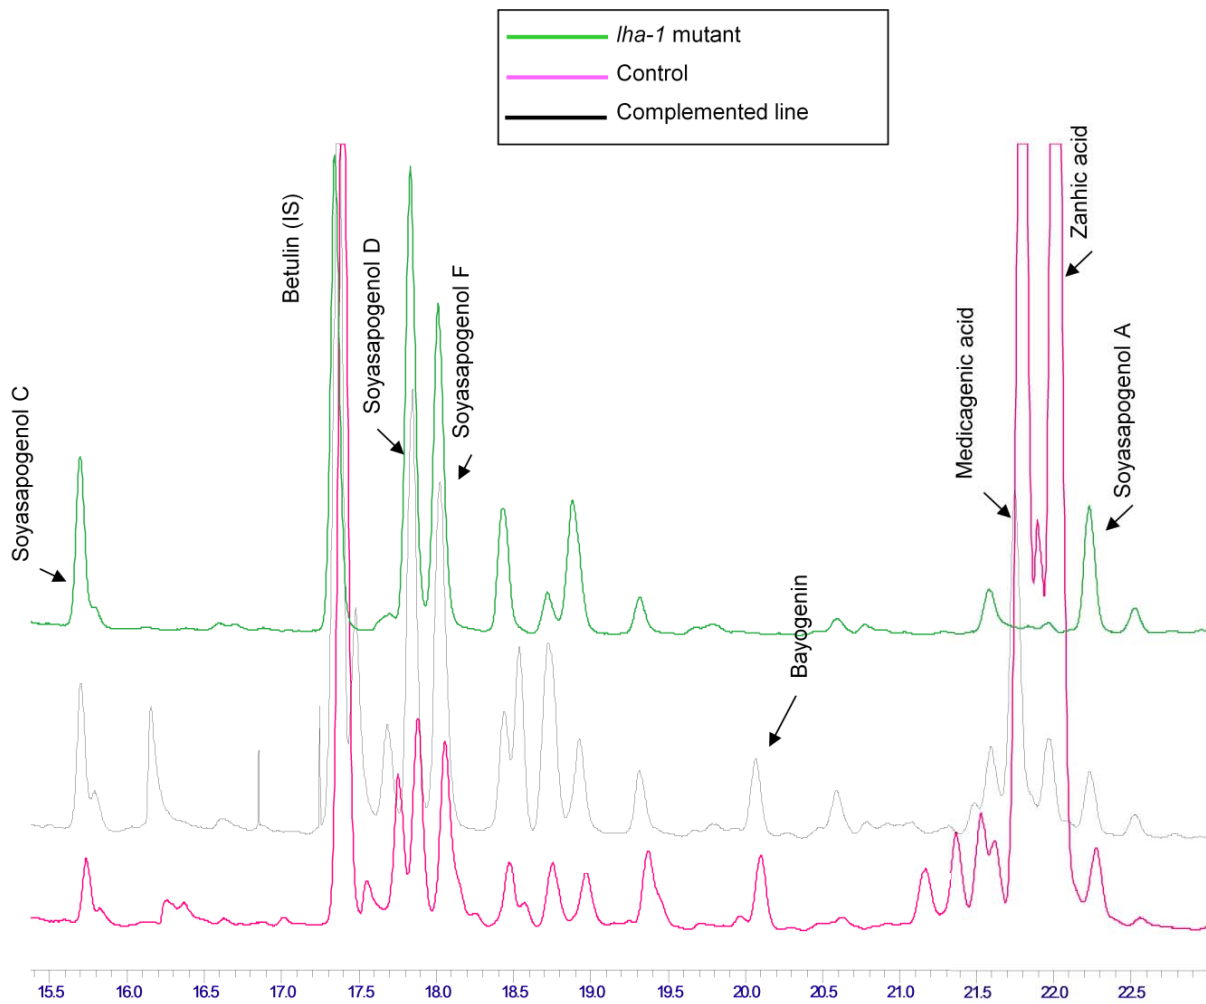

**Supplemental Figure 3.** GC/FID chromatograms of sapogenins of control line (E113) (red), *lha-1* mutant (green) and one transformed line derived from complementation of *lha-1* mutant (black). Identification of soyasapogenol B was achieved considering all the artefact compounds detected (soyasapogenols C, D and F).

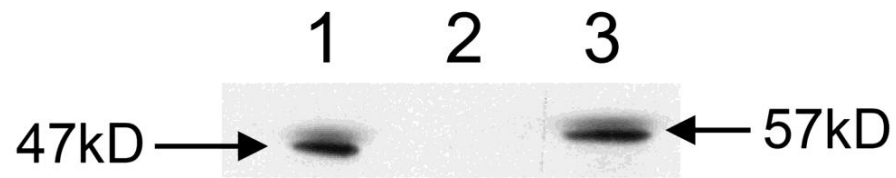

**Supplemental Figure 4.** Immunoblot analysis of the CYP716A12-harboring strains. Lane 1, FLAG-BAP™ Fusion Protein (SIGMA-Aldrich); lane 2, WAT11 expressing pESC-HIS under galactose induction; lane 3, WAT11 expressing pESC-HIS-CYP716A12:FLAG under galactose induction.

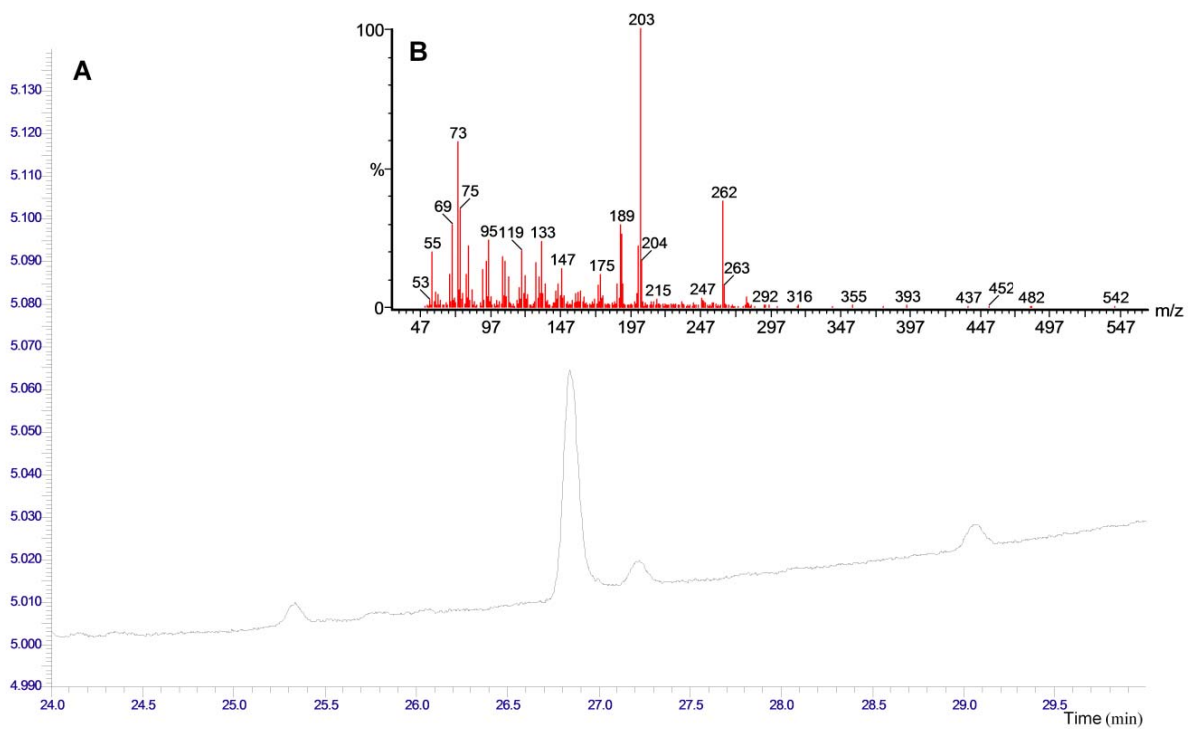

**Supplemental figure 5.** GC-MS analysis (A) and mass spectrum (B) of the standard oleonic acid.

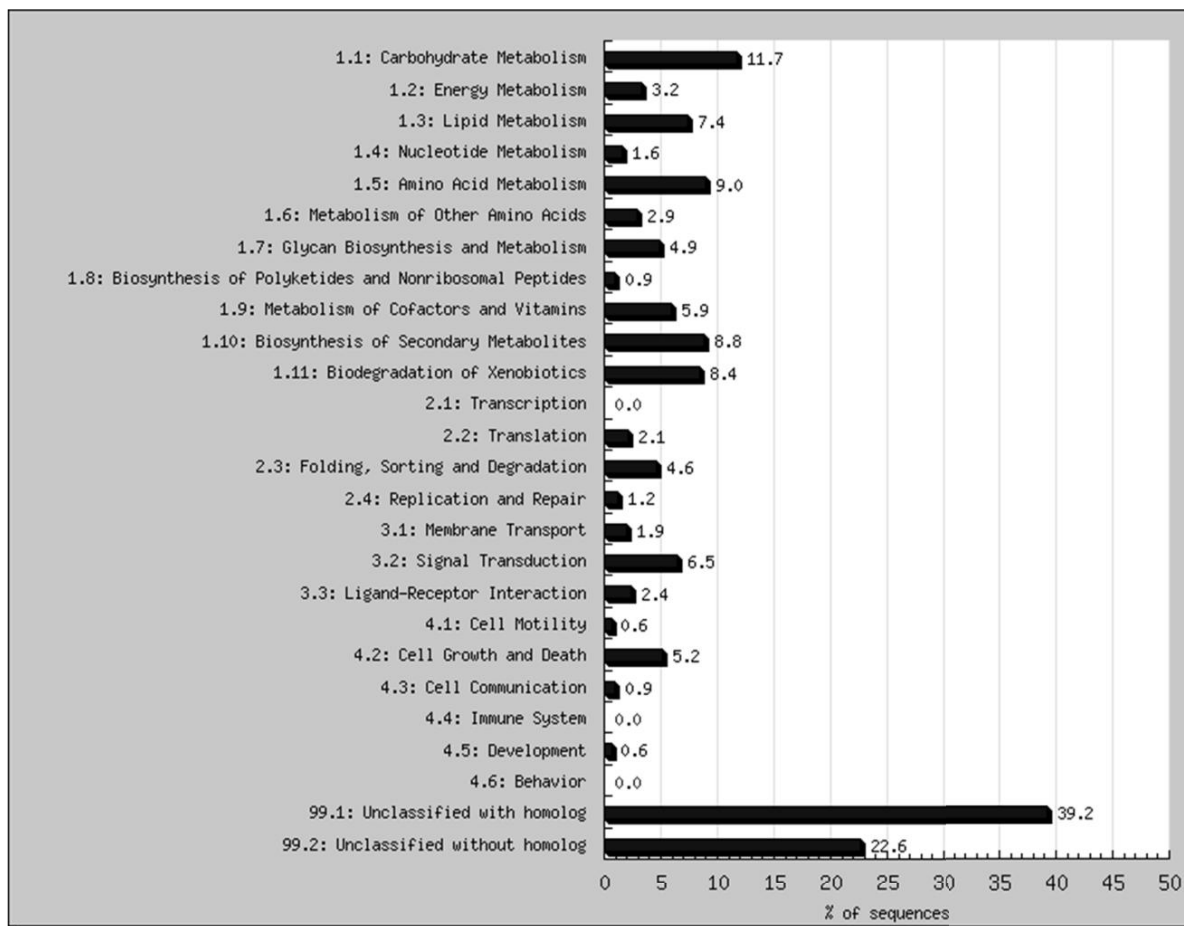

**Supplemental Figure 6.** Bar charts showing GO annotations of the *M. truncatula* probesets modulated in the *lha-1* mutant.



**Supplemental Table 3.** ANOVA of sapogenin content (GC/FID) in control plants sampled in different organs at different phenological stages: test F and significance. Only significant contrasts are reported.

| Source of variation | SoyaA    | SoyaB    | Spg non-hem | Olea     | Hed      | Bayo     | Med      | Zan       | Spg hem  |
|---------------------|----------|----------|-------------|----------|----------|----------|----------|-----------|----------|
| Stage               | 1.5 ns   | 1.2 ns   | 1.4 ns      | 0.12 ns  | 2.7 ns   | 2.4 ns   | 16.1**** | 4.7*      | 11.9**** |
| Organ               | 11.8**** | 26.1**** | 22.9****    | 34.7**** | 79.4**** | 54.2**** | 0.7 ns   | 232.3**** | 32.5**** |
| StagexOrgan         | 0.4 ns   | 0.7 ns   | 0.7 ns      | 0.12 ns  | 1.4 ns   | 2.6 ns   | 3.4*     | 0.2 ns    | 2.0 ns   |
| Contrast            |          |          |             |          |          |          |          |           |          |
| S1vsS2/ root        |          |          |             |          | 9.0**    |          | 32.6**** | 5.3*      | 21.2**** |
| S1vsS3/ root        |          |          |             |          | 6.8*     | 13.6***  | 25.0**** |           | 17.1**** |
| S2vsS3/ root        |          |          |             |          |          | 8.4**    |          |           |          |
| LvsR/ S1            |          | 13.9***  | 13.4***     | 19.4**** | 21.8**** | 10.6***  |          | 123.0**** | 21.4**** |
| LvsS/ S1            |          |          |             |          |          |          |          | 103.1**** | 17.7**** |
| RvsS/ S1            |          | 12.0***  | 10.8***     | 19.4**** | 21.3**** | 17.5**** |          |           |          |
| LvsR/ S2            | 5.2*     | 20.6**** | 18.7****    | 13.5***  | 53.9**** | 16.3**** | 4.9*     | 111.7**** |          |
| LvsS/ S2            |          |          |             |          |          |          |          | 119.6**** | 22.4**** |
| RvsS/ S2            | 10.3***  | 21.2**** | 18.4****    | 13.5***  | 51.5**** | 21.8**** | 6.4*     |           | 9.2**    |
| LvsR/ S3            | 5.8*     | 5.6*     | 4.5*        | 19.4**** | 46.8**** | 48.2**** |          | 122.3**** | 5.6*     |
| LvsS/ S3            |          |          |             |          |          |          |          | 117.6**** | 23.6**** |
| RvsS/ S3            | 9.6**    | 8.7**    | 6.9*        | 19.4**** | 51.5**** | 61.8**** |          |           | 6.3*     |

\* P≤0.05; \*\* P≤0.01; \*\*\* P≤0.005; \*\*\*\* P≤0.001; ns: not significant

SoyaA: soyasapogenol A; SoyaB: soyasapogenol B; Olea: oleanolic acid; Hed: hederagenin; Bayo: bayogenin; Med: medicagenic acid; Zan: zanhic acid; Spg hem: haemolytic sapogenin; Spg non-hem: non-haemolytic sapogenin.

S1, S2, S3: stages 1, 2 and 3 respectively. L: leaves; R: roots; S: stems.

Error: within repetition (pool of 3 plants, one from each block) variation (n=3).



**Supplemental Table 4.** List of selected genes/TC modulated in *lha-1* mutant and cited in the text.

| Probe set ID               | Transcript ID | Annotation                       | Fold change |
|----------------------------|---------------|----------------------------------|-------------|
| 2,3-oxidosqualene cyclases |               |                                  |             |
| Mtr.46511.1.S1_at          | Medtr8g018540 |                                  | 2.1 down    |
| Mtr.46511.1.S1_x_at        |               |                                  |             |
| Mtr.46512.1.S1_at          | Medtr8g018550 |                                  | 1.8 down    |
| Mtr.46514.1.S1_x_at        | Medtr8g018610 | Similar to <i>MtbAS1</i>         | 1.8 down    |
| Cytochrome P450s           |               |                                  |             |
| Mtr.8618.1.S1_at           | TC100810      | CYP93E2                          | 2.3 down    |
| Mtr.37299.1.S1_at          | TC100323      | CYP72A67                         | 2.6 up      |
| Mtr.37298.1.S1_at          | TC100322      | CYP72A68                         | 1.6 up      |
| Mtr.10812.1.S1_at          | Medtr5g102050 | CYP71D64                         | 1.7 down    |
| Mtr.6667.1.S1_at           | Medtr8g050160 | Putative CYP76C2                 | 2.4 up      |
| Mtr.10692.1.S1_at          | TC107626      | CYP76E1                          | 1.6 up      |
| Mtr.12208.1.S1_at          | TC93934       | CYP76X2                          | 1.7 up      |
| Mtr.6322.1.S1_s_at         | BQ139200      | Similar to CYP72A1               | 1.5 down    |
| Mtr.43267.1.S1_at          | Medtr8g045080 | CYP72A65                         | 1.8 down    |
| Mtr.4947.1.S1_at           | AW127462      | CYP715A2                         | 2.0 down    |
| Mtr.20735.1.S1_at          | Medtr8g090600 | Similar to CYP90C1               | 1.7 up      |
| Mtr.21518.1.S1_s_at        | Medtr2g104500 | CYP74B, HPL3                     | 1.6 down    |
| Mtr.9885.1.S1_at           | Medtr2g104500 | CYP74B, HPL3                     | 1.5 down    |
| Mtr.12632.1.S1_at          | TC95424       | CYP81E9 isoflavone3'-hydroxylase | 2.0 up      |
| Mtr.38274.1.S1_at          | TC102428      | CYP90B                           | 1.9 up      |
| Mtr.9112.1.S1_at           | TC102429      | CYP90B                           | 1.8up       |
| Mtr.42172.1.S1_s_at        | TC110889      | Similar to CYP707A3              | 1.5 up      |
| Glycosyltransferases       |               |                                  |             |
| Mtr.12473.1.S1_a           | TC94916       | UGT73F3                          | 1.5 down    |
| Mtr.11236.1.S1_at          | Medtr2g008370 | UGT91H5                          | 2.7 down    |
| Mtr.8530.1.S1_s_at         | Medtr2g008360 | UGT91H6                          | 1.5 down    |
| Mtr.49684.1.S1_at          | Medtr7g076790 | Similar to <i>MtUGT73F3</i>      | 1.6 down    |
| Mtr.43628.1.S1_at          | Medtr5g076110 | Similar to <i>MtUGT73F3</i>      | 3.5 up      |
| Mtr.37367.1.S1_at          | Medtr2g008380 | Similar to <i>MtUGT91H6</i>      | 1.6 down    |
| Mtr.39289.1.S1_at          | TC104594      | Putative GT                      | 1.8 up      |
| Mtr.3013.1.S1_at           | Medtr6g014410 | Putative GT                      | 1.6 down    |
| Mtr.42552.1.S1_at          | TC111804      | Putative GT                      | 1.9 up      |
| Mtr.40639.1.S1_at          | TC107730      | Putative GT                      | 1.8 up      |
| Mtr.36069.1.S1_s_at        | AJ845941      | Putative GT                      | 1.5 down    |
| Mtr.16941.1.S1_at          | Medtr4g130290 | Putative GT                      | 2.0 down    |
| Mtr.29993.1.S1_at          | Medtr3g009370 | Putative GT                      | 1.7 up      |
| Mtr.44439.1.S1_at          | Medtr6g014590 | Putative GT                      | 1.7 up      |
| Msa.2667.1.S1_at           |               | Putative GT                      | 1.5down     |
| Msa.2806.1.S1_at           |               | Putative GT                      | 1.6 up      |
| Msa.1673.1.S1_at           |               | Putative GT                      | 2.06up      |
| Msa.1267.1.S1_at           |               | Putative GT                      | 1.8up       |
| Pathogenesis related genes |               |                                  |             |
| Mtr.47298.1.S1_at          |               | PGIP                             | 5.4 down    |
| Mtr.42876.1.S1_at          |               | Similar to <i>PsPRP4</i>         | 7.5 up      |
| Mtr.41478.1.S1_at          |               | Similar to <i>MtPR10-1 ABR18</i> | 5.0 up      |

**Supplemental Table 5.** List of primers used in this research.

| <b>Primer name</b> | <b>Primer sequence (5' – 3')</b> |
|--------------------|----------------------------------|
| Right 1            | CGTTCAAGATGCCTCTACCG             |
| Left 1             | TATCTTCCACACGTGAAAATGC           |
| Right 2            | AGACGTTCCAACCACGTCTT             |
| Left 2             | TTTTTATTTTCATCCGACATGG           |
| Primer RACE 3'     | TATCTCTACCAATTGATTTGCCAGG        |
| Primer RACE 5'     | CCTGGCAAATCAATTGGTAGAGATA        |
| Primer RACE 5'nest | ATCAATTGGTAGAGATATGATTCC         |
| ATG2fw             | ATGGAGCCTAATTTCTATCTC            |
| TAA2rw             | TTAAGCTTTGTGTGGATAAAG            |
| Msc27fw            | GATGAGCTTCTGTCGAGACTC            |
| Msc27rw            | GCTACCATCATCATGCATGC             |
| CYPfw              | TTTGCCACCTGGTAAAATGG             |
| CYPrw              | AGCCTTTGTTGAATGGTGTTC            |
| InsBfw             | GCCAGTGAGGTTGGCTTAGT             |
| InsBrw             | TCTCAAGAGTGAGATATACCGG           |
| PSKI               | GTA AACGACGGCCAGTGA              |
| P450fw             | GGAAATTGCAAATCGAAACC             |
| P450rw             | AAAGAACC GAATGAAACCAATCA         |
| CypEcoRIfw         | GAATTCATGGAGCCTAATTTCTATCTCTCCC  |
| CypClalrev         | ATCGATTTAGCTTTGTGTGGATAAAGGC     |
| CYP-38FW           | ACTGCCATTGCACCATTGTA             |
| CYP-220RW          | CCAGGTGGCAAATTTAATGG             |
| Msc27 269FW        | CACCCAACTAGATGCAGAGAA            |
| Msc27 424rev       | CACCATCCTTGTAGTAGGCAAA           |
